# Supplementary material for: Alternative transcription of a shorter, non-anti-angiogenic thrombospondin-2 variant in cancer-associated blood vessels
Source: PubMed Central journal article supplement — Oncogene. 2018 Feb 22;37(19):2573–85. doi: 10.1038/s41388-018-0129-z (PMC5945577; doi:10.1038/s41388-018-0129-z), 2018-02-22
Supplement: 41388_2018_129_MOESM8_ESM.pdf [file 41388_2018_129_MOESM8_ESM.pdf]

**Supplementary Table 1.** Genes with statistically significant splicing identified by all three bioinformatics methods (FIRMA, MIDAS, ANOSVA) with corresponding splicing scores and p values.

| Gene symbol | Number of adjacent exons spliced | FIRMA scores | FIRMA p-values | MIDAS scores | MIDAS p-values | ASNOVA p-values |
|-------------|----------------------------------|--------------|----------------|--------------|----------------|-----------------|
| GALNT1      | 0                                | 2.43         | 0              | 2.44         | 0.017303       | 2.79372E-05     |
| RPN2        | 2                                | 3.03         | 0              | 2.63         | 0.040224       | 0.00313795      |
| SLC38A1     | 2                                | 2.68         | 0.00001        | 5.37         | 0.02265        | 0.00159715      |
| HMGXB4      | 1                                | -2.96        | 0.00001        | -1.71        | 0.037055       | 0.00839021      |
| RPL11       | 0                                | -2.11        | 0.00004        | -3.15        | 0.017841       | 0.00996667      |
| SPIN1       | 0                                | -1.98        | 0.00004        | 4.33         | 0.029267       | 4.14807E-07     |
| SMC2        | 1                                | -2.29        | 0.00006        | 2.01         | 0.049588       | 2.27244E-07     |
| ILF2        | 1                                | 2.11         | 0.00007        | -2.54        | 0.034805       | 6.02988E-05     |
| SLC39A6     | 1                                | 1.95         | 0.00007        | 4.46         | 0.037141       | 1.47252E-11     |
| PRDX1       | 0                                | 3.10         | 0.00008        | 3.84         | 0.02488        | 0.00158676      |
| RABGAP1L    | 5                                | 2.67         | 0.00009        | 2.08         | 0.029123       | 0.00557443      |
| TTC17       | 0                                | -1.88        | 0.00009        | 2.50         | 0.042319       | 0.00115331      |
| RAP2A       | 3                                | -2.61        | 0.00009        | 3.86         | 0.023404       | 2.08717E-06     |
| COL5A2      | 11                               | -2.69        | 0.0001         | 3.78         | 0.018022       | 5.59315E-12     |
| SOX4        | 2                                | -1.89        | 0.0001         | -4.73        | 0.033221       | 0.00152663      |
| CEP350      | 0                                | 2.65         | 0.00011        | 2.07         | 0.04104        | 0.00654876      |
| THBS2       | 8                                | -2.13        | 0.00012        | -2.82        | 0.026826       | 1.82292E-10     |
| GNA13       | 0                                | -1.92        | 0.00012        | 2.71         | 0.024925       | 4.43889E-05     |
| TAOK1       | 1                                | -1.62        | 0.00013        | 1.91         | 0.039657       | 4.12566E-05     |
| STXBP5      | 2                                | 1.59         | 0.00016        | -2.09        | 0.0353         | 0.0051397       |
| CAPRIN1     | 4                                | -2.71        | 0.00016        | 1.77         | 0.016125       | 0.00401313      |
| CCT2        | 5                                | -2.91        | 0.00017        | -5.31        | 0.034639       | 1.66782E-08     |
| SEC61A1     | 0                                | -2.89        | 0.00019        | 3.35         | 0.041778       | 1.60599E-05     |
| PCGF2       | 0                                | 1.90         | 0.00023        | -3.09        | 0.022781       | 0.00870917      |
| PTK2        | 4                                | -2.47        | 0.00024        | 1.05         | 0.029415       | 0.000841486     |
| SPARC       | 2                                | 1.93         | 0.00026        | 1.23         | 0.041602       | 1.34396E-05     |
| MARS        | 2                                | 2.46         | 0.0003         | -3.46        | 0.022779       | 0.000409151     |
| YTHDF1      | 1                                | -2.23        | 0.00033        | 3.19         | 0.025487       | 0.00245809      |
| DARS        | 2                                | -1.63        | 0.00034        | 4.02         | 0.033051       | 0.00201025      |
| TFRC        | 2                                | 1.92         | 0.00034        | 2.19         | 0.026858       | 0.00014995      |
| USP34       | 1                                | 1.56         | 0.00035        | 2.54         | 0.033149       | 0.00176853      |
| CAND1       | 7                                | 2.94         | 0.00036        | 1.72         | 0.036665       | 1.18221E-05     |
| ALCAM       | 6                                | 1.95         | 0.00036        | 1.49         | 0.042686       | 3.01511E-06     |
| ATP2A2      | 2                                | -1.81        | 0.00037        | 2.52         | 0.037323       | 0.00337872      |
| KIF23       | 3                                | -2.61        | 0.00037        | 3.08         | 0.01916        | 3.14786E-11     |
| PSMA7       | 2                                | -2.00        | 0.00037        | 2.69         | 0.040371       | 0.000465175     |
| NEXN        | 0                                | 1.90         | 0.00042        | -2.67        | 0.042861       | 0.00545863      |
| IARS2       | 6                                | -2.16        | 0.00043        | 4.17         | 0.02786        | 0.00132895      |
| GNAS        | 4                                | 2.09         | 0.00043        | 1.26         | 0.048403       | 3.58804E-06     |
| RCC2        | 2                                | -1.60        | 0.00044        | -2.10        | 0.049557       | 1.56397E-05     |
| CLSPN       | 12                               | -1.71        | 0.00045        | -2.78        | 0.018561       | 7.88203E-10     |
| SIRT1       | 2                                | 2.00         | 0.00045        | 6.12         | 0.026176       | 1.11635E-08     |
| VCAN        | 1                                | -2.40        | 0.00049        | 2.01         | 0.01888        | 0.000133398     |
| COL12A1     | 5                                | -2.16        | 0.00049        | 3.61         | 0.017637       | 1.24805E-11     |
| YY1         | 3                                | 2.56         | 0.0005         | 6.02         | 0.027863       | 2.08364E-10     |
| MANF        | 8                                | -1.69        | 0.00051        | 4.77         | 0.028571       | 1.57539E-08     |
| GNB1        | 3                                | -1.44        | 0.00052        | 2.12         | 0.034731       | 0.00462593      |
| MED13       | 1                                | 2.22         | 0.00052        | -1.91        | 0.035959       | 0.00149218      |
| ESYT1       | 4                                | 1.78         | 0.00052        | -3.86        | 0.024699       | 6.8431E-07      |
| SLC17A5     | 4                                | -1.78        | 0.00054        | 3.04         | 0.030499       | 0.000364402     |
| SSR1        | 1                                | 1.75         | 0.00055        | 2.07         | 0.043299       | 0.000606738     |
| MATR3       | 3                                | -2.40        | 0.00058        | 1.19         | 0.034371       | 3.28259E-06     |
| ZBTB44      | 3                                | -2.08        | 0.00059        | 2.58         | 0.040439       | 0.00216664      |
| CCNJ        | 3                                | 1.70         | 0.00063        | -3.53        | 0.032536       | 0.000314969     |
| GATA6       | 1                                | -1.88        | 0.00063        | 3.67         | 0.048284       | 7.21843E-06     |
| IDH1        | 1                                | -1.95        | 0.00064        | -3.54        | 0.01861        | 9.24217E-05     |
| APP         | 6                                | -1.94        | 0.00064        | 2.25         | 0.044619       | 0.000200504     |
| EZH2        | 4                                | 4.95         | 0.00067        | 3.06         | 0.046242       | 2.39594E-10     |
| TPX2        | 10                               | -1.54        | 0.0007         | 2.58         | 0.048631       | 5.44606E-10     |
| ZBTB41      | 1                                | -2.61        | 0.0007         | 2.16         | 0.023079       | 0.00520708      |
| DSG2        | 1                                | 1.72         | 0.0007         | 3.20         | 0.039713       | 1.23594E-09     |
| CCNA2       | 4                                | -1.77        | 0.00072        | 2.83         | 0.032232       | 1.44783E-10     |
| TRIM33      | 8                                | -2.05        | 0.00073        | 1.60         | 0.021483       | 0.00122048      |
| PRKDC       | 2                                | -1.41        | 0.00073        | -3.85        | 0.031811       | 4.25999E-06     |
| GDE1        | 4                                | -1.61        | 0.00076        | 2.90         | 0.045743       | 7.47662E-08     |
| PDIA6       | 0                                | 1.97         | 0.00078        | 2.84         | 0.033651       | 0.0000354       |
| RDH10       | 4                                | 1.95         | 0.00078        | 1.91         | 0.02083        | 0.000160419     |
| TCF3        | 1                                | -1.79        | 0.00081        | -4.04        | 0.040331       | 0.00294546      |
| ADAMTS9     | 10                               | -1.96        | 0.00086        | -2.23        | 0.020655       | 0.000177544     |
| BRAF        | 2                                | 1.75         | 0.00086        | -3.33        | 0.013879       | 0.00937293      |
| LEMD3       | 7                                | 2.09         | 0.0009         | 2.86         | 0.048904       | 0.000502659     |
| BUB1        | 6                                | -3.24        | 0.0009         | -2.30        | 0.020682       | 0.00287803      |
| DLGAP5      | 2                                | 1.63         | 0.00092        | 1.82         | 0.036205       | 3.41289E-09     |
| LAT2        | 0                                | 2.07         | 0.00094        | 3.42         | 0.047207       | 0.00462413      |
| TNFRSF21    | 7                                | 2.05         | 0.00098        | 3.26         | 0.030943       | 1.01738E-08     |
| MTCH2       | 5                                | -1.68        | 0.00099        | -3.38        | 0.013583       | 0.00801725      |
