# Supplementary figures and images for: Alternative transcription of a shorter, non-anti-angiogenic thrombospondin-2 variant in cancer-associated blood vessels
Source: PubMed Central journal article supplement — Oncogene. 2018 Feb 22;37(19):2573–85. doi: 10.1038/s41388-018-0129-z (PMC5945577; doi:10.1038/s41388-018-0129-z), 2018-02-22

# Supplementary Figure 1

**A**

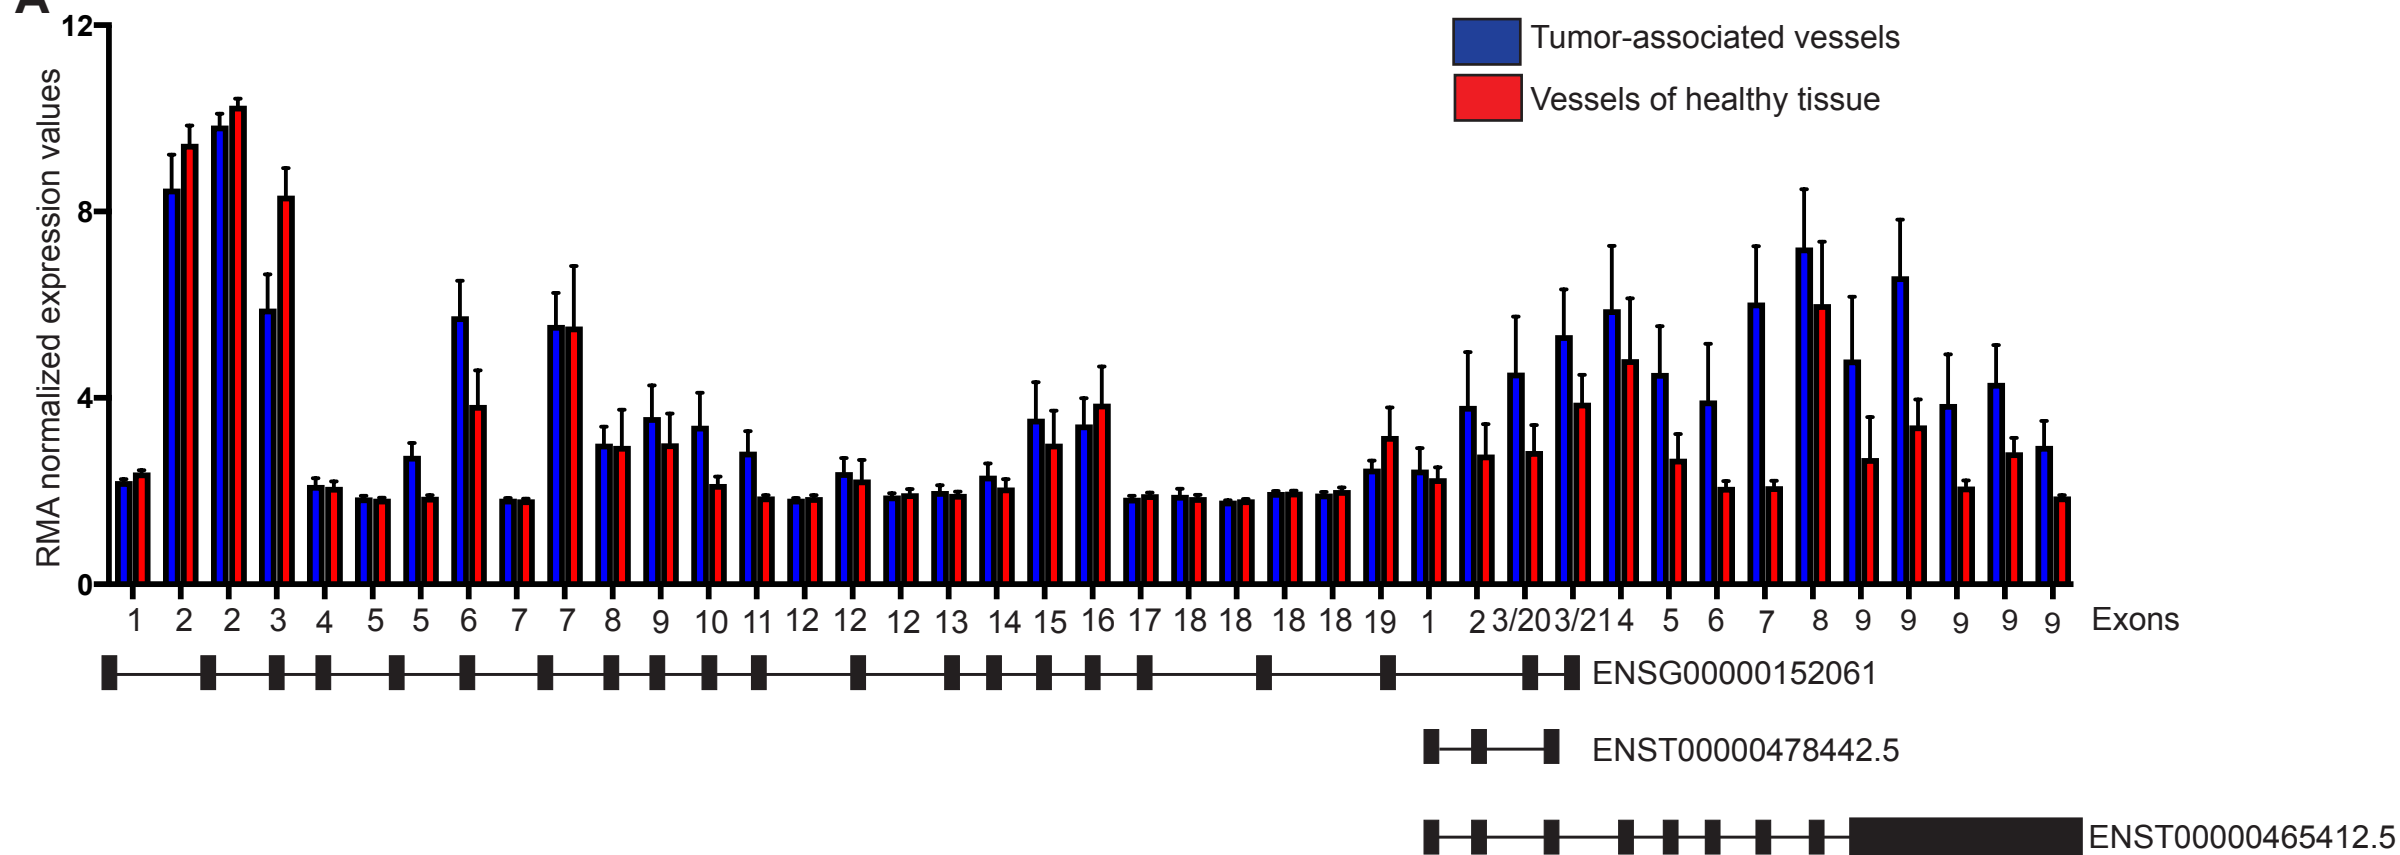

**B**

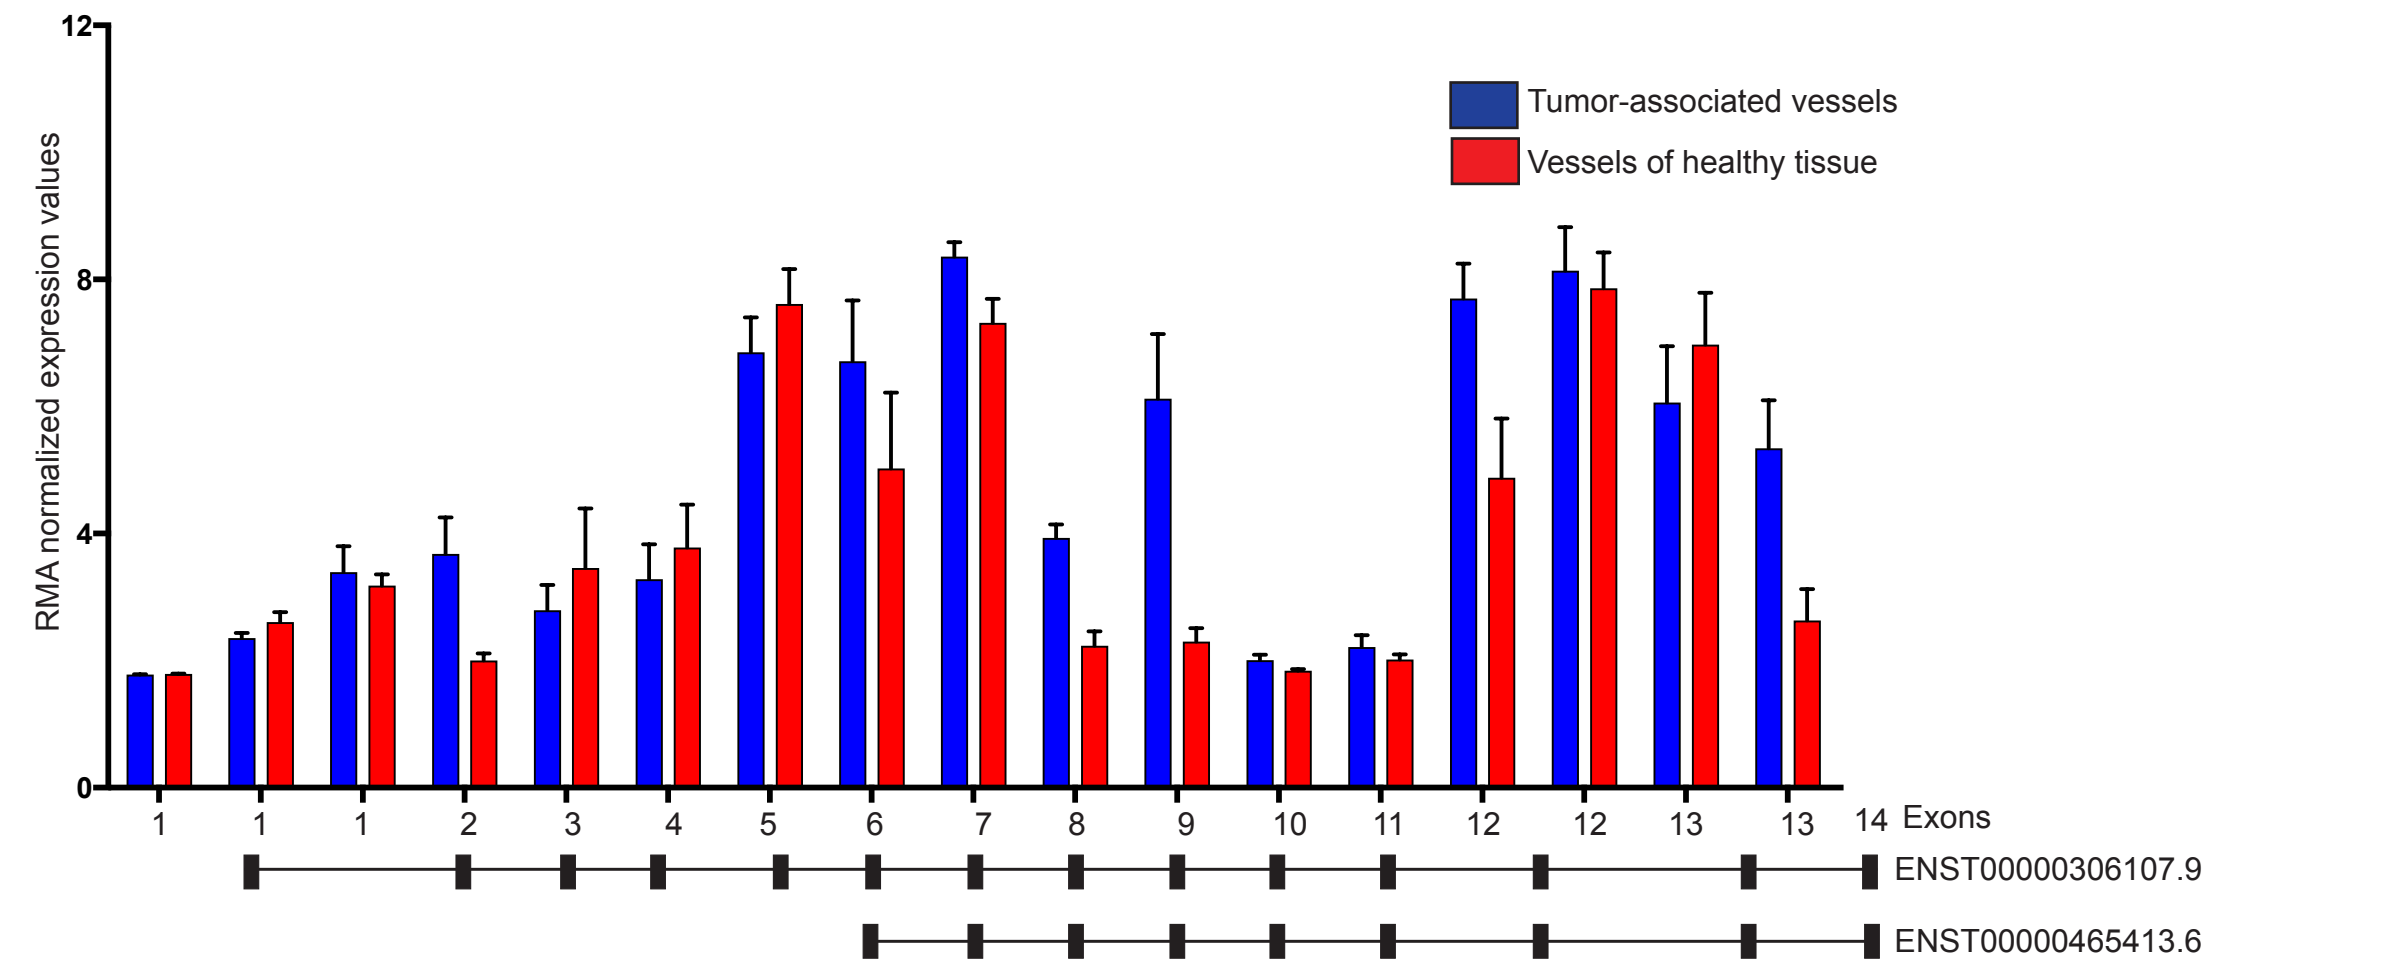

Supplement: 41388_2018_129_MOESM2_ESM.pdf [file 41388_2018_129_MOESM2_ESM.pdf]
